# Supplementary material
Source: Springer Nature journal article supplement (https://www.springermedizin.de/resource/supplementary/12913_2010_1839_MOESM4_ESM.pdf/9529008)

# Behavior of discrimination index and difficulty index

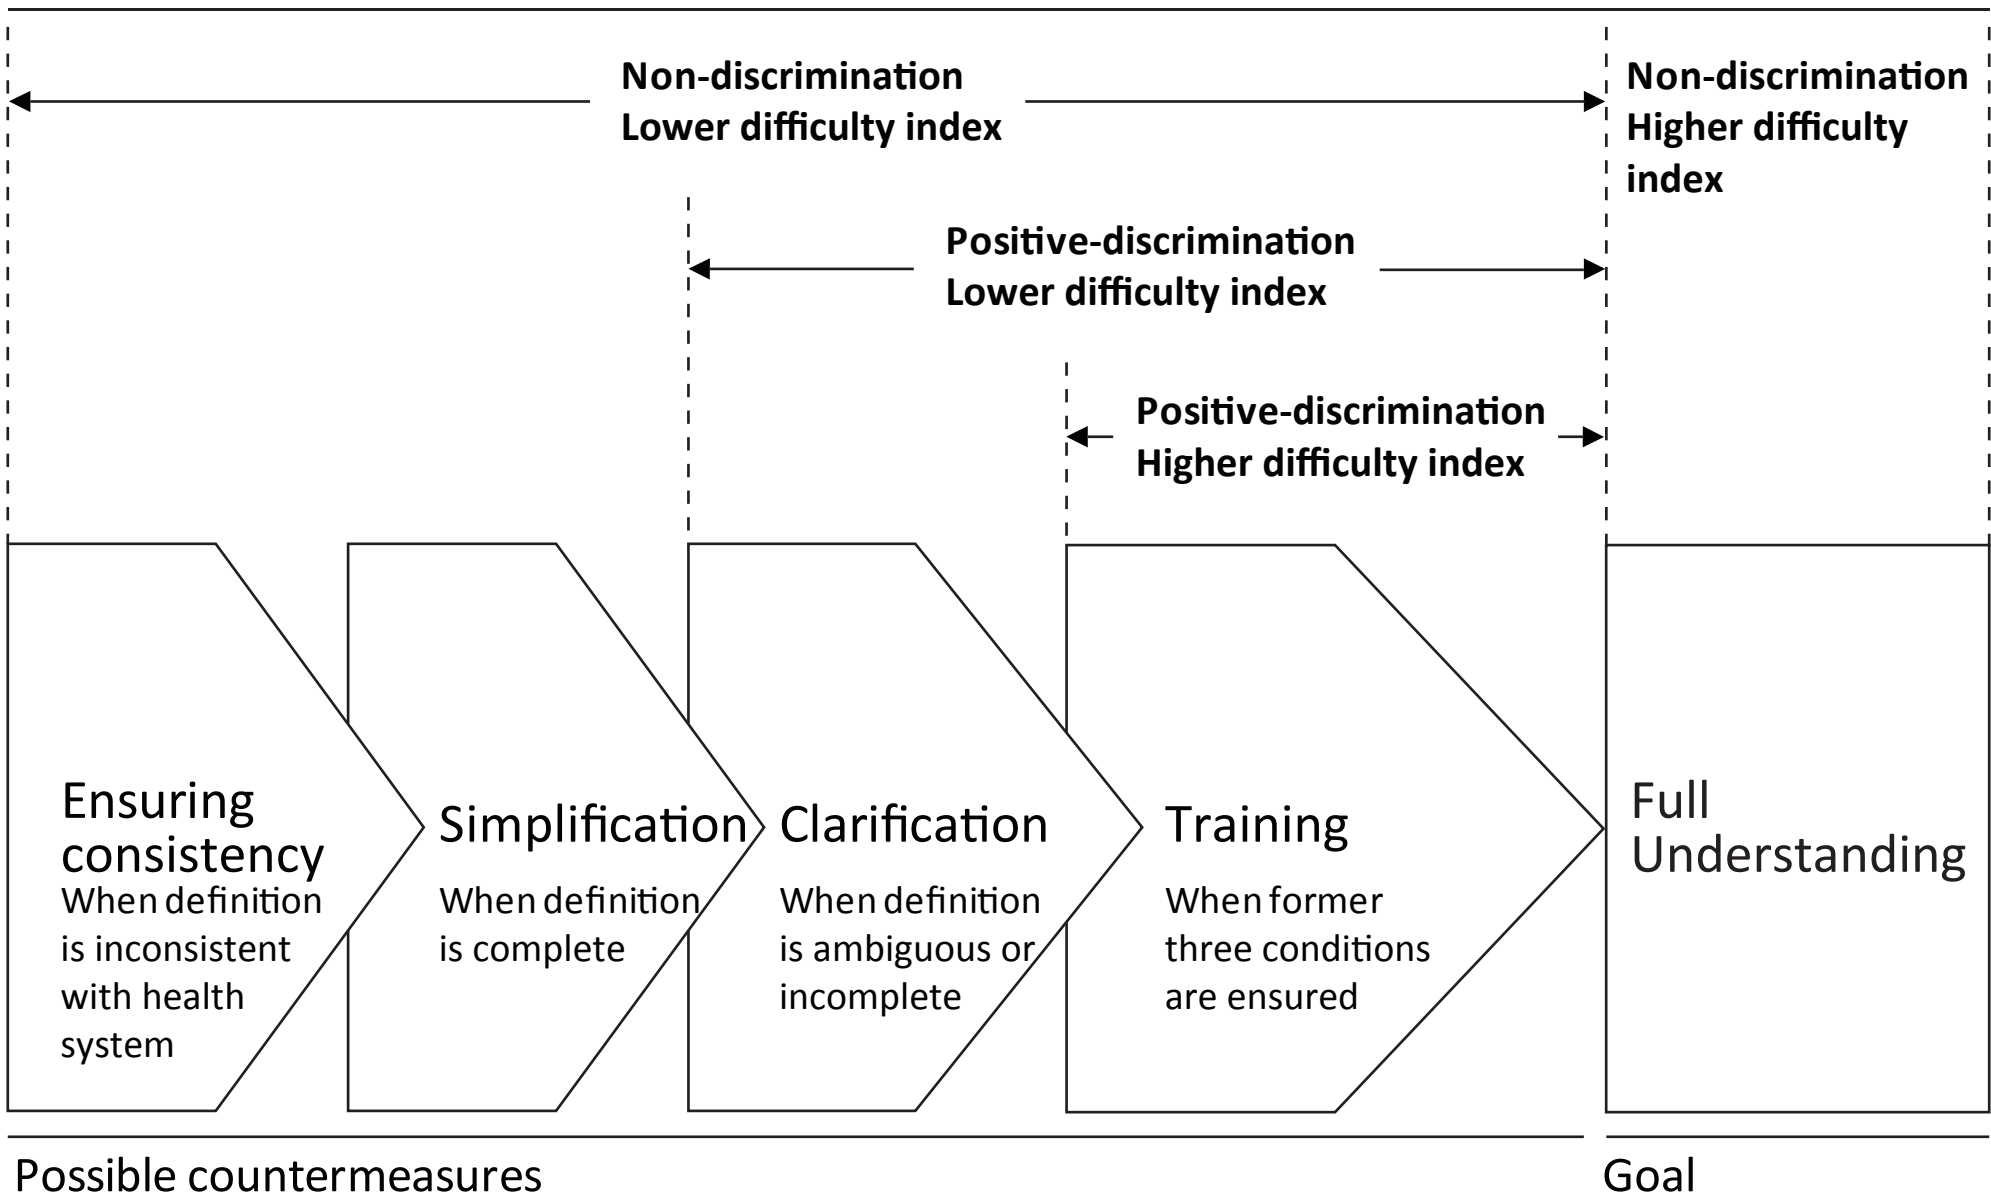

Supplement: MOESM4 [file 9529008]
